# Supplementary material for: Microengineered Multi‐Organoid System from hiPSCs to Recapitulate Human Liver‐Islet Axis in Normal and Type 2 Diabetes
Source: PubMed Central journal article supplement (PMC8844474; doi:10.1002/advs.202103495), 2021-12-23
Supplement: ADVS-9-2103495-s001.pdf [file ADVS-9-2103495-s001.pdf]

## Supporting Information

for *Adv. Sci.*, DOI: 10.1002/advs.202103495

Microengineered multi-organoid system from hiPSCs to recapitulate human liver-islet axis in normal and type 2 diabetes

*Tingting Tao, Pengwei Deng, Yaqing Wang, Xu Zhang, Yaqiong Guo, Wenwen Chen, Jianhua Qin\**

Supplementary Materials

**Microengineered multi-organoid system from hiPSCs to recapitulate human liver-islet axis in normal and type 2 diabetes**

Tingting Tao<sup>1,4</sup>, Pengwei Deng<sup>1,4</sup>, Yaqing Wang<sup>1</sup>, Xu Zhang<sup>1</sup>, Yaqiong Guo<sup>1,4</sup>,  
Wenwen Chen<sup>1,4</sup>, Jianhua Qin<sup>\*1,2,3,4</sup>

1 Division of Biotechnology, Dalian Institute of Chemical Physics, Chinese Academy of Sciences

2 Institute for Stem Cell and Regeneration, Chinese Academy of Sciences, Beijing, China.

3 CAS Center for Excellence in Brain Science and Intelligence Technology, Chinese Academy of Sciences, Shanghai, China.

4 University of Chinese Academy of Sciences, Beijing, China.

\*Corresponding Author. Jianhua Qin, Dalian Institute of Chemical Physics, Chinese Academy of Sciences, 457 Zhongshan Road, Dalian 116023, China. E-mail: jhqin@dicp.ac.cn (J.Q.).

## Supplementary Figures

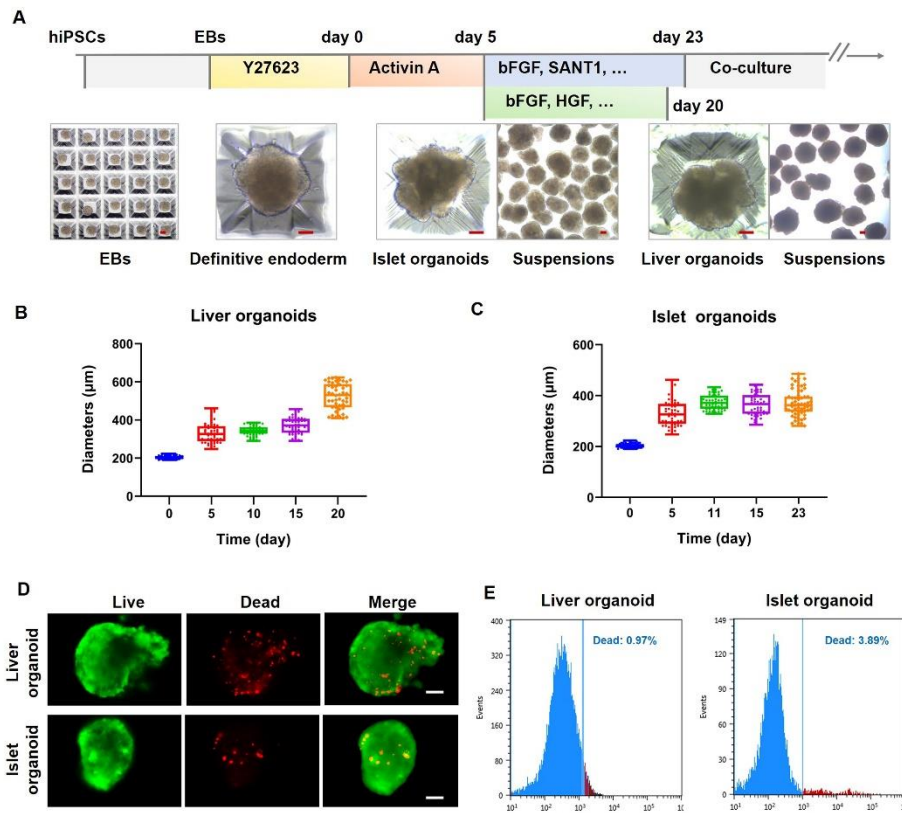

**Supplementary Fig. 1. Generation and development of liver and islet organoids derived from hiPSCs.** (A) Bright-field images of liver and islet organoids at different stages during the differentiation period. (B–C) Organoid morphology was analyzed using the average diameters of the liver and islet organoids at different time points. (D–E) Live/dead and flow cytometry assays were conducted to assess the cell viability of organoids by staining with a live/dead kit on days 20 and 23. Scale bars: 100  $\mu\text{m}$ .

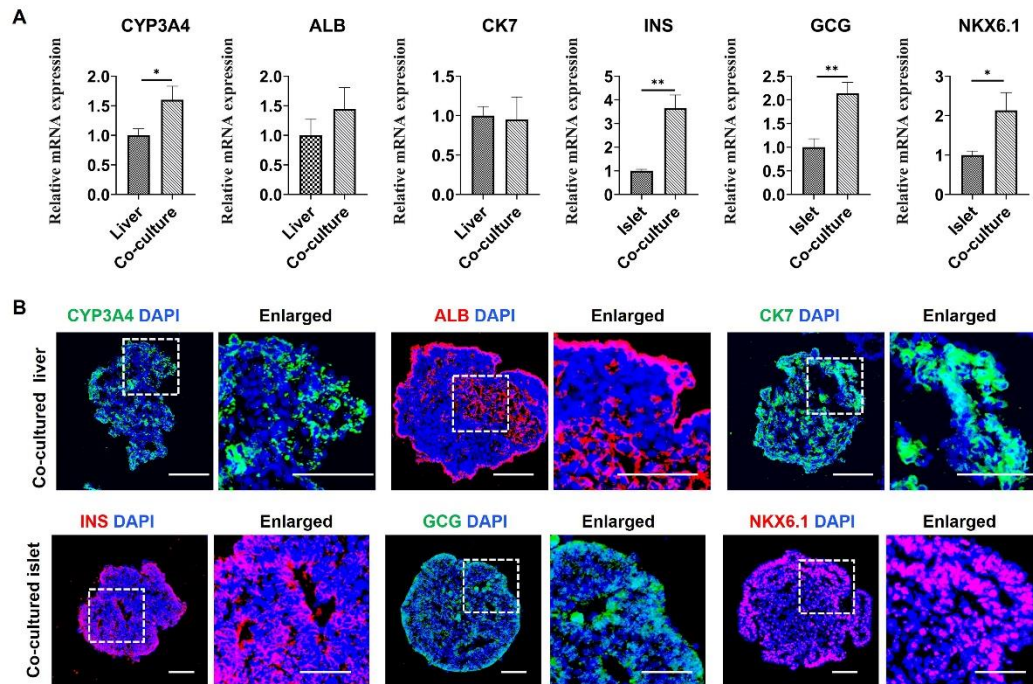

**Supplementary Fig. 2. The expression of functional proteins and mRNAs in liver and islet organoids under mono- and co-culture conditions on day 5.** (A) Quantification of the relative mRNA expression levels of liver-associated genes (*CYP3A4*, *ALB*, and *CK7*) in liver organoids and islet-associated genes (*NKX6.1*, *INS*, and *GCG*) in islet organoids using RT-PCR. Expression values were normalized to *GAPDH*. Relative expression is represented as the mean  $\pm$  SEM, three independent experiments were performed. The data were analyzed using Student's t-test, \* $p < 0.05$ , \*\* $p < 0.01$ , and \*\*\* $p < 0.001$ . (B) Immunohistochemical staining of *CYP3A4* (red), *ALB* (red), and *CK7* (green) in liver organoids and *NKX6.1* (red), *INS* (red), and *GCG* (green) in pancreatic islet organoids. DAPI was used to stain the nuclei (blue). Scale bars: 100  $\mu\text{m}$ . Enlarged views are shown to the right of each image. Scale bars: 20  $\mu\text{m}$ .

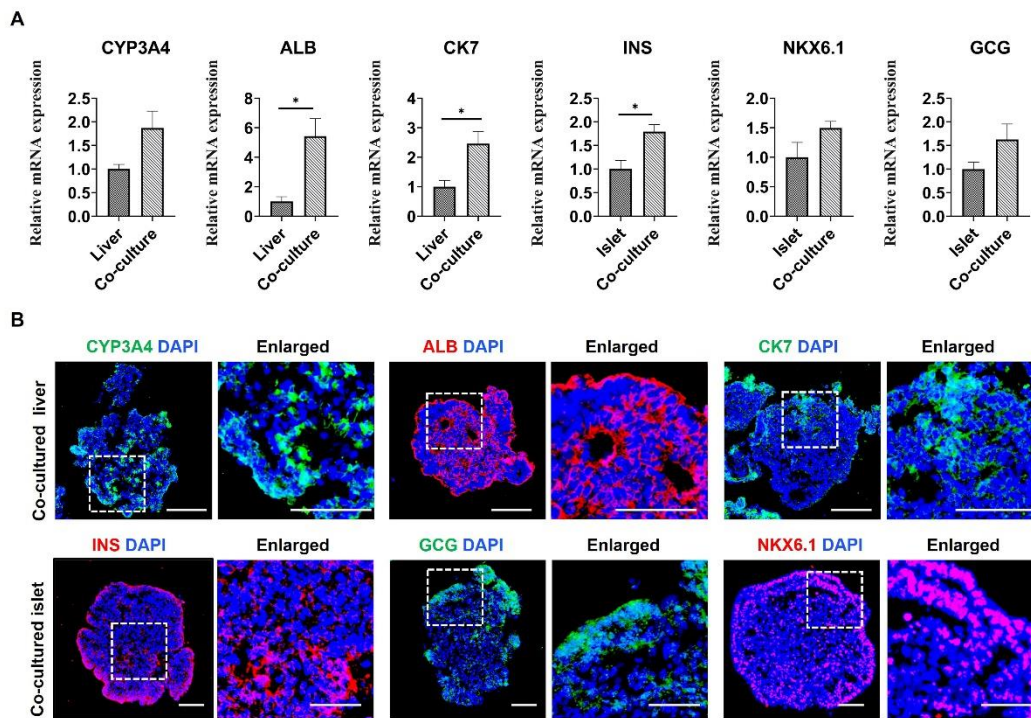

**Supplementary Fig. 3. Comparison of the expression of tissue-specific proteins and mRNA in liver and islet organoids under mono- and co-culture conditions on day 30.** (A) Quantification of relative mRNA expression levels of liver-associated genes (*CYP3A4*, *ALB*, and *CK7*) and islet-associated genes (*NKX6.1*, *INS*, and *GCG*) in organoids using RT-PCR. Expression values were normalized to *GAPDH*. Relative expression is represented as the mean  $\pm$  SEM, three independent experiments were performed. The data were analyzed using Student's t-test, \* $p < 0.05$ , \*\* $p < 0.01$ , and \*\*\* $p < 0.001$ . (B) Hepatic-specific markers *CYP3A4* (red), *ALB* (red), and *CK7* (green) in liver organoids and pancreatic-associated markers *NKX6.1* (red), *INS* (red), and *GCG* (green) in islet organoids were identified by immunofluorescence staining. DAPI was used to stain the nuclei (blue). Scale bars: 100  $\mu\text{m}$ . Enlarged views are shown at the right side. Scale bars: 20  $\mu\text{m}$ .

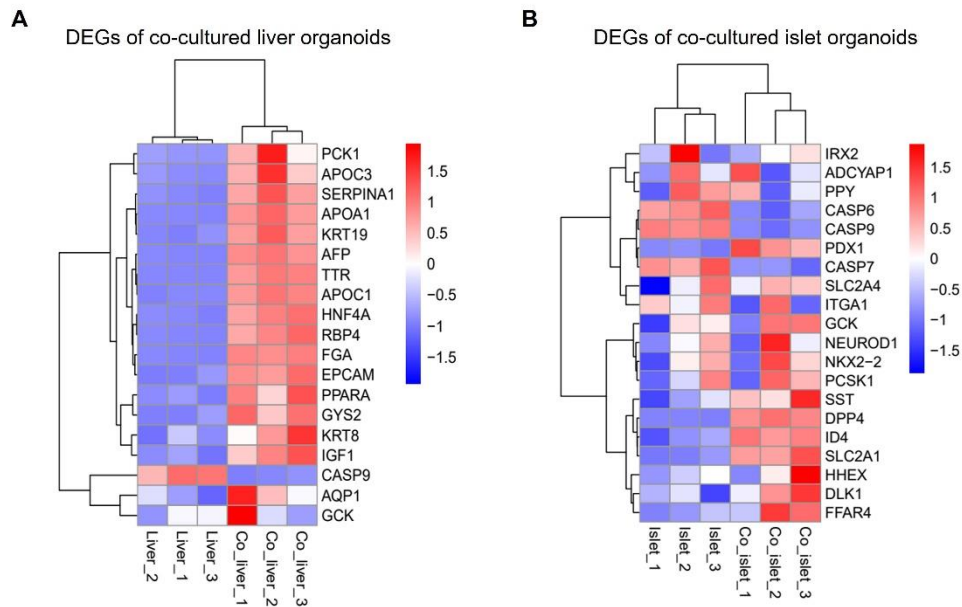

**Supplementary Fig. 4. Analysis of functional DEGs in liver and islet organoids in the multi-organoid-on-chip system.** (A-B) Heat map of the liver and islet organoid DEGs under mono- and co-culture conditions at day 15. Three repeats were performed. The gradient color scale at the right top indicates the  $\log_2$  (fold change) in expression of the co-cultures compared with the mono-cultures.

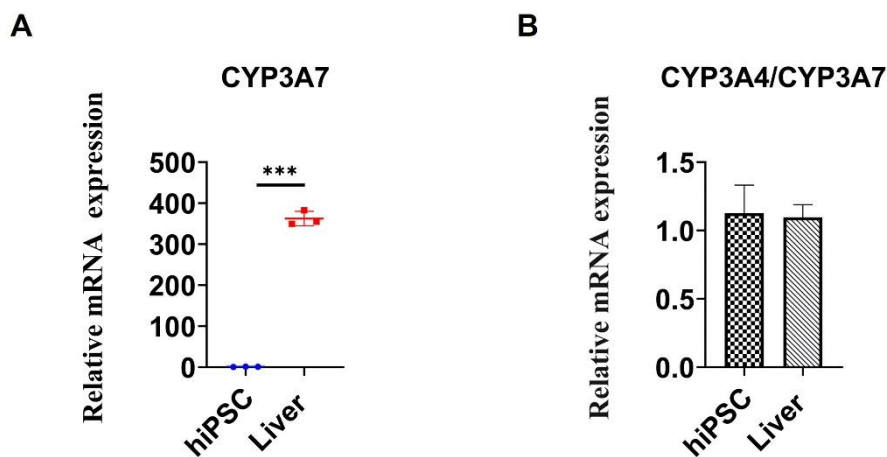

**Supplementary Fig. 5. mRNA expression levels of CYP3A7 and CYP3A4/CYP3A7 ratios in the hiPSCs derived liver organoids.** (A) Quantification of relative mRNA expression levels of liver-associated genes *CYP3A7* in liver organoids using RT-PCR. (B) *CYP3A4/CYP3A7* mRNA expression ratios in the liver organoids. Expression values were normalized to GAPDH. Relative expression is represented as the mean  $\pm$  SEM, three independent experiments were performed. The data were analyzed using Student's t-test, \*\*\* $p < 0.001$ .

## Supplementary Tables

Supplementary Table 1. Primary antibody information

| Target | Dilution | Host       | Company                |
|--------|----------|------------|------------------------|
| INS    | 1:1000   | guinea pig | Abcam, ab7842          |
| SST    | 1:100    | rat        | Abcam, ab30788         |
| PPY    | 1:100    | rabbit     | Gene Tex, GTX128056    |
| GCG    | 1:100    | rabbit     | ThermoFisher, PA513442 |
| NKX6.1 | 1:500    | rabbit     | CST, D804R             |
| ALB    | 1:1000   | goat       | Bethyl, A80-129A       |
| CYP3A4 | 1:500    | mouse      | Absin, abs132219       |
| CK7    | 1:8000   | rabbit     | Abcam, ab181598        |
| GLUT1  | 1:500    | rabbit     | RuiYing Bio, RLT1928   |
| GLUT4  | 1:1000   | rabbit     | Abcam, ab654           |

Supplementary Table 2. RT-PCR primer sequences

| Primer | Forward sequence (5'→3') | Reverse sequence (5'→3') |
|--------|--------------------------|--------------------------|
| INS    | TGTACCAGCATCTGCTCCCTCTA  | TGCTGGTTCAAGGGCTTTATTCCA |
| SST    | CCCCAGACTCCGTCAGTTTC     | TCCGTCTGGTTGGGTTTCAG     |
| PPY    | ACCTGCGTGGCTCTGTTACT     | TACCTAGGCCTGGTCAGCAT     |
| GCG    | AGGCAGACCCACTCAGTGA      | AACAATGGCGACCTCTTCTG     |
| NKX6.1 | ATTCGTTGGGGATGACAGAG     | TGGGATCCAGAGGCTTATTG     |
| ALB    | GCCTTTGCTCAGTATCTT       | AGGTTTGGGTTGTCATCT       |
| CYP3A4 | TTCAGCAAGAAGAACAAGGACAA  | GGTTGAAGAAGTCCTCCTAAGC   |
| CYP3A7 | AAACTTGGCCGTGGAAACCT     | CAGCATAGGCTGTTGACAGTC    |
| CK7    | AAGAACCAGCGTGCCAAGTT     | CACGCTCATGAGTTCCTGGT     |
| SLC2A1 | GCAACGGCTTAGACTTCGAC     | TGCGACTTCAGGCACATAAC     |
| SLC2A4 | TGTCACAGTCCCCAACACCA     | CCGAAGCATGTGGAAAGCA      |
